# Supplementary material for: General and Predictable Synthesis of Ultrahigh-Surface-Area Porous Carbons with Superior Yield via Preferential Removal of sp2-Hybridized Atoms
Source: Research Square preprint supplement (doi:10.21203/rs.3.rs-89679/v1), 2020-10-13
Supplement: Supplementary file 1 [file 00ab98d5b4c070e475797146.docx]

Supplementary Materials

General and Predictable Synthesis of Ultrahigh-Surface-Area Porous Carbons with Superior Yield *via* Preferential Removal of sp2-Hybridized Atoms

Peifeng Yu, Weicai Zhang, Yingliang Liu*, Fei Xu*, Yeru Liang*

Correspondence to: [tliuyl@scau.edu.cn](mailto:tliuyl@scau.edu.cn); [feixu@nwpu.edu.cn](mailto:feixu@nwpu.edu.cn); liangyr@scau.edu.cn

**This file includes:**

Supplementary Eqs. 1-5

Supplementary Figs. 1 to 15

Supplementary Tables 1 to 5

References

# Supplementary Eqs. 1-5

# KOH activation mechanism for normal process:

Supplementary Eq. 1

Supplementary Eq. 2

Supplementary Eq. 3

Supplementary Eq. 4

Supplementary Eq. 5

Traditional KOH activation mechanism has been well-studied in recent years, such as *Journal of Materials Chemistry* **22**, 23710-23725 (2012) and *Carbon* **45**, 2529-2536 (2007). Our *ex-situ* XRD results well consist of the reported in the references.


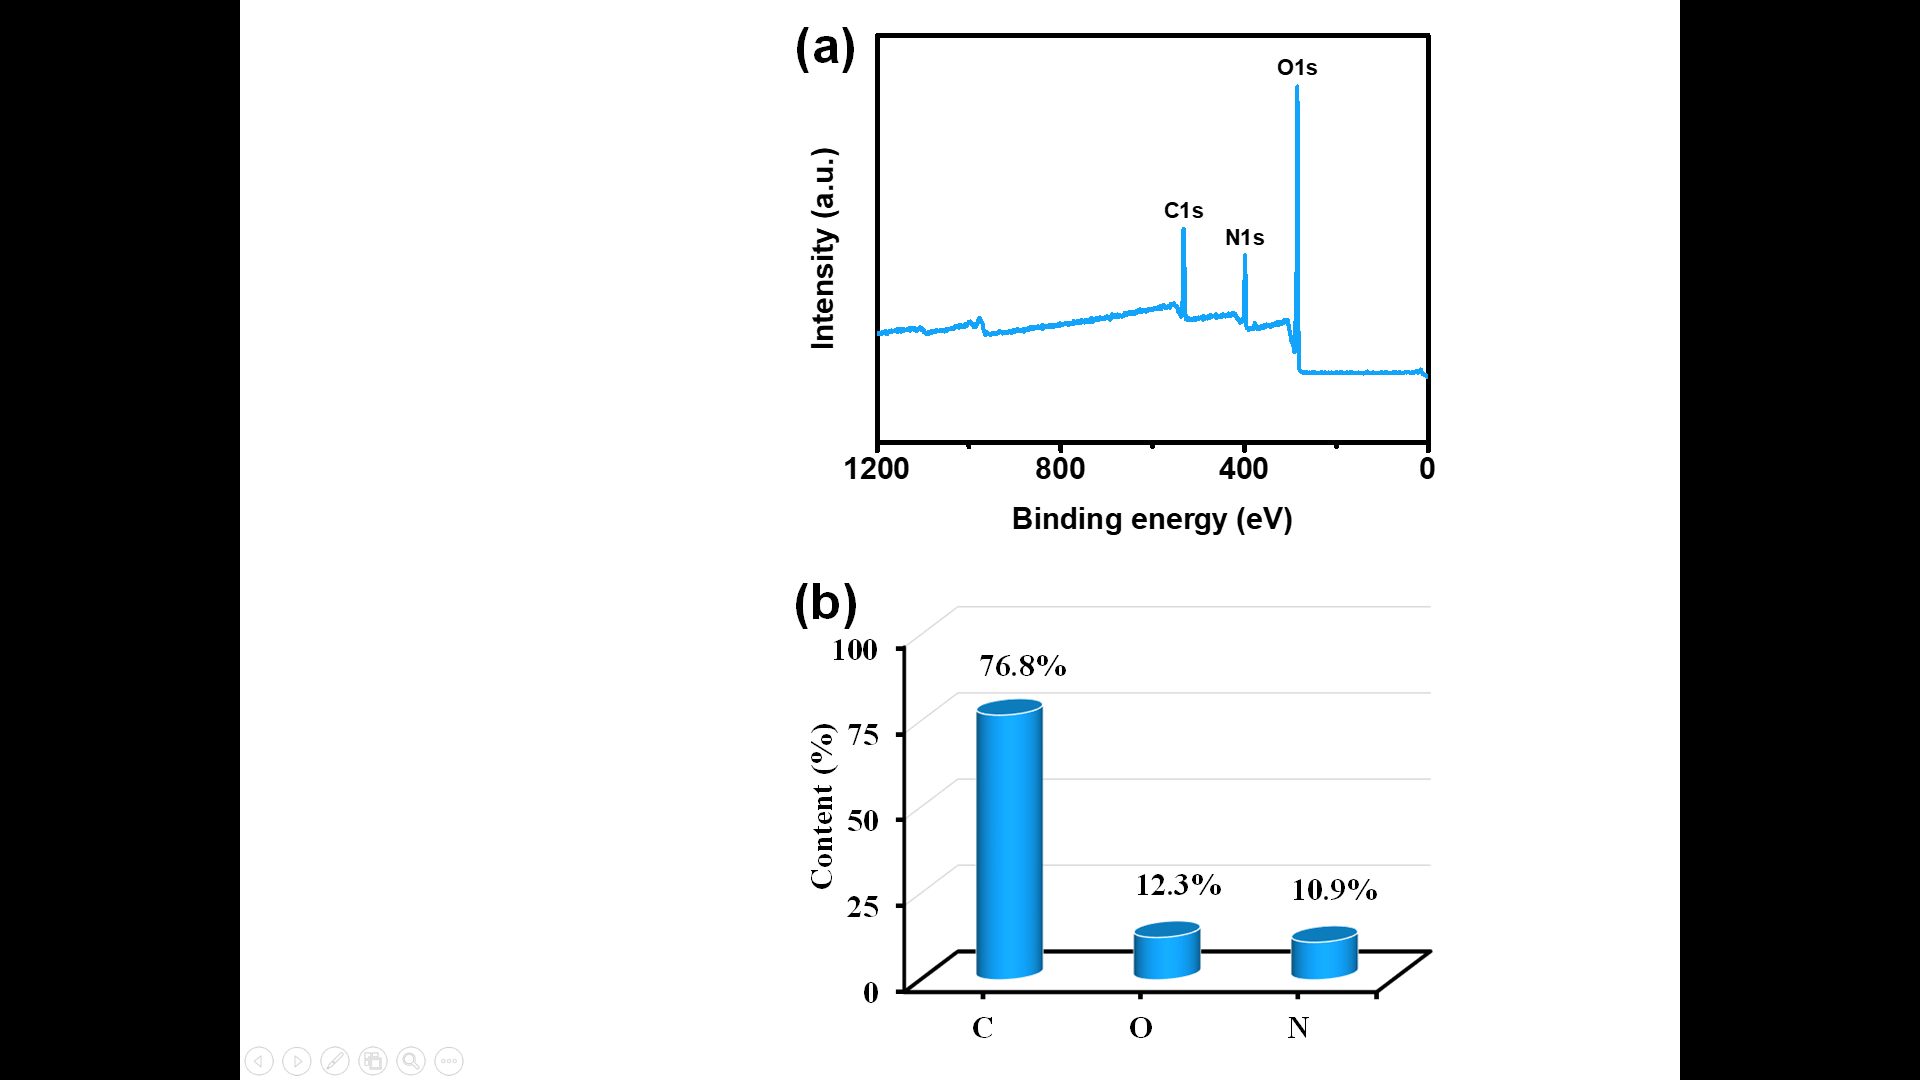


**Supplementary Fig. 1. (a) XPS spectrum and (b) element content information of the semi-carbonized mushroom.** XPS was used to characterize the element content of the obtained semi-carbonized materials. This XPS spectrum suggests the existence of C, N and O elements in the semi-carbonized mushroom with atomic percentage of 76.8 at.%, 10.9 at.% and 12.3 at.%, respectively, which illustrates the successful incorporation of nitrogen atom into the framework of the semi-carbonized mushroom.

**Supplementary Fig. 2. High-resolution N1s spectrum of the semi-carbonized mushroom.** The high-resolution N1s spectrum could be deconvoluted into two components at 398.2 eV and 399.2 eV, corresponding to pyridinic-N and N-C sp3, respectively. Correspondingly, the ratio of pyridinic-N was calculated as high as 82%, which implies that the hybridization between N and carbon atoms is mainly sp2.

**Supplementary Fig. 3. (a) N2 adsorption-desorption isotherms and (b) pore size distribution curves of the as-obtained M-PC and the M-control sample.** The N2 isotherms of the M-PC and the M-control sample could be categorized as type I isotherm based on the IUPAC classification, indicating the presence of the micropores and small mesopores in these porous carbons. The pore size distribution curves derived from the N2 isotherms based on NLDFT method show the pore size is around 1.2 and 2.5 nm in M-PC, while the M-control sample is dominated by micropores with pore size below 2.0 nm.

**Supplementary Fig. 4. Thermal gravimetric curve of the N-enrich resource, *i.e.*, melamine.** This curve shows that the melamine additive has a notable weight loss in the temperature range of 300~350 °C and yields very little residual carbon above 350 °C, as decomposed to volatile matters.


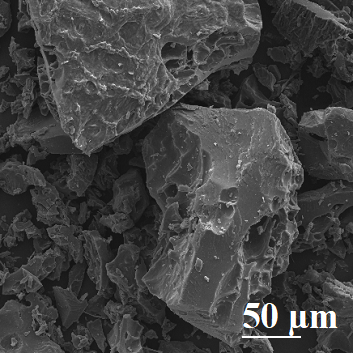


**Supplementary Fig. 5.** **SEM image of the semi-carbonized mushroom.** In general, as the starting materials, semi-carbonized precursors obtained at low temperatures usually consist of sp2-hybridized and sp3-hybridized carbon atoms, where those sp3-hybridized carbon atoms play important roles in crosslinking the graphite-like microcrystals within the semi-carbonized framework. Thus, the semi-carbonized mushroom displays a morphology of irregular bulk.


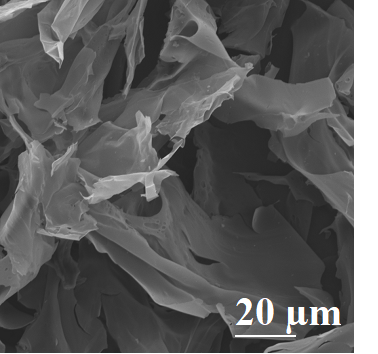


**Supplementary Fig. 6. SEM image of the M-control sample.** The sp3-hybridized carbon atoms were more reactive than sp2-hybridized carbon atoms, resulting in preferential removal of sp3-hybridized carbon atoms in normal KOH activation process. After etching the sp3-hybridized carbon atoms, the graphite-like microcrystals are no longer restricted, leading to the nanosheet-like structure.

**Supplementary Fig. 7. Photo of the as-prepared M-PC and M-control sample.** The priority of removal of the sp3-hybridized carbon atoms was not only unbeneficial to generate of the pore structure of as-prepared porous carbons but also causing a relatively low yield due to more carbon species had to be consumed to construct a highly porous structure, leading to a significantly higher yield in M-PC.


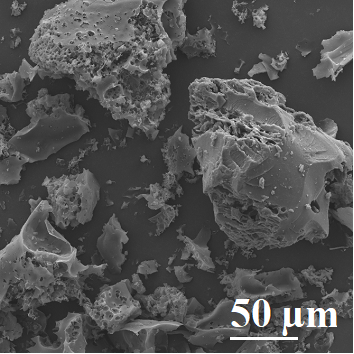


**Supplementary Fig. 8. SEM image of the M-PC.** With the presence of nitrogen heteroatoms, the sp2-hybridized carbon atoms but not sp3-hybridized carbon atoms were preferentially etched, and thus the M-PC can maintain the original irregular bulk as its parent sample, *i.e.*, semi-carbonized mushroom.

**Supplementary Fig. 9. XRD patterns of the M-PC and M-control sample.** In XRD patterns, the (002) diffraction peak is assigned to the sp2-hybridized carbon. In the traditional process, the sp3-hybridized carbon atoms were etched, remaining a higher proportion of sp2-hybridized carbon atoms in control sample. While introducing the nitrogen atoms, the sp2-hybridized carbon atoms were preferentially etched, resulting in a lower proportion of sp2-hybridized carbon atoms in M-PC. Thus, the diffraction intensity of (002) diffraction peak in the control sample was higher than that of the M-PC.

**Supplementary Fig. 10. Raman spectra of the M-PC and M-control sample.** In the Raman spectra, the G-band located at about 1580 cm-1 corresponds to the E2g symmetry vibration mode of sp2-hybridized carbon atoms in both rings and chains. The higher intensity of the M-control sample indicates its higher proportion of sp2-hybridized carbon atoms when compared to the M-PC.

**Supplementary Fig. 11. Calculated values of ID/IG of the M-PC and M-control sample.** The higher ratio of ID/IG of the M-PC indicates its higher proportion of sp3-hybridized carbon atoms when compared to the M- control sample.

**Supplementary Fig. 12.** **High-resolution C1s spectra of (a) M-PC and (b) M-control sample.** The content of sp3-hybridized atoms and sp2-hybridized carbon atoms can be quantitatively determined by XPS. The XPS results reveal that the ratio between sp3-hybridized carbon atoms and sp2-hybridized carbon atoms in the M-PC and M-control sample are 0.9 and 0.3, respectively. It further demonstrates that the sp3-hybridized carbon atoms were preferentially removed in the traditional KOH activation, yielding a higher ratio of sp2-hybridized carbon atoms in the M-control sample. In contrast, the M-PC possesses a higher ratio of sp2-hybridized carbon atoms because the sp3-hybridized carbon atoms were preferentially removed during the process for fabricating M-PC.

**Supplementary Fig. 13.** **Excess hydrogen uptake curves measured at (a) 20 bar, (b) 30 bar and (c) 40 bar for M-PC.** The H2 uptake properties of the M-PC were performed at -196 oC in the pressure range from 20 to 40 bar. The M-PC delivers very excellent adsorption H2 capacities of 5.8 wt.%, 6.6 wt.%and 8.4 wt.% at 20, 30 and 40 bar, respectively.

**Supplementary Fig. 14.** **CO2 capture isotherms of M-PC obtained at (a) 20 bar, (b) 30 bar and (c) 40 bar.** The CO2 uptake properties of the M-PC were performed at 25 oC in the pressure range from 20 to 40 bar. The M-PC delivers very attractive adsorption CO2 capacities of 24.4 mmol g-1, 30.2 mmol g-1 and 39.6 mmol g-1 at 20, 30 and 40 bar, respectively.

**Supplementary Fig. 15. Galvanostatic charge/discharge curves measured at various current densities in a three-electrode system by using 6 mol L-1 KOH aqueous electrolyte.** The curves show no appreciable voltage drop at different current densities. The M-PC shows intriguing specific capacitance of 634, 430, 343, 318, 302, 287, 283, 275, 267and 266 F g-1 at 0.1, 0.2, 0.5, 1, 2, 5, 10, 20, 40 and 50 A g-1, respectively.

**Supplementary Table 1.** Comparison of the specific surface area and yield for porous carbons prepared in this work and the state-of-the-art carbon materials reported in the literatures.

| References | Sample | Specific surface area (m2 g-1) | Yield (wt.%) |
| --- | --- | --- | --- |
|  | **M-PC** | **4482** | **9.52** |
| This work | **C-PC** | **3504** | **9.62** |
|  | **PR-PC** | **3954** | **35.08** |
| 1 | K-RPC | 2016 | 1.4 |
| 2 | CR-850-RA | 1210 | 23.2 |
| 3 | HPNCT-800 | 1776 | 20.8 |
| 4 | GLUHT/N/5.0 | 2129 | 4.0 |
| 5 | Glu-180-1000 | 1704 | 6.0 |
| 6 | SAC4 | 618.54 | 4.11 |
| 7 | M1273-150 | 3350 | 2.1 |
| 8 | SF-HPC | 3350 | 6 |
| 9 | AG-4–750 | 2526 | 5 |
| 10 | PPNC-700 | 178 | 8.5 |
| 11 | KOH-C | 726 | 12.5 |
| 12 | AC-4 | 2264 | 18.0 |
| 13 | PFAC | 1223 | 32.1 |
| 14 | BLPC | 1521 | 30.3 |
| 15 | - | 917 | 18.7 |
| 16 | PGC | 1103 | 17 |
| 17 | KOH@LiCl/KCl | 997 | 10.3 |
| 18 | PVFC800 | 1012 | 35.1 |
| 19 | MPC-750 | 1881 | 14 |
| 20 | BHA-HPC | 2060 | 17 |
| 21 | CPH-09 | 490 | 13.5 |

**Supplementary Table 2.** Comparison of the specific surface area for M-PC and the state-of-the-art materials reported in the literatures.

| References | Sample | Specific surface area (m2 g-1) |
| --- | --- | --- |
| This work | **M-PC** | **4482** |
| 22 | HPC-650 | 1093 |
| 23 | HEBLC-3 | 2312 |
| 24 | C-HPC | 3532 |
| 25 | C-PC-3 | 3315 |
| 26 | PPC | 3751 |
| 27 | HMPC | 3257 |
| 28 | HPC-700 | 3151 |
| 29 | AC-K5 | 3190 |
| 30 | MNC-1-AC-3 | 2745 |
| 31 | CNX-1-AC | 2864 |
| 32 | S4800P | 3951 |
| 33 | CN4800 | 3802 |
| 34 | L2600P | 2224 |
| 35 | SD2600 | 866 |
| 36 | SD4800D | 2980 |
| 37 | LAC4800 | 3235 |
| 38 | CKHP800-2 | 1256 |
| 39 | AC-CB850@5Ton | 2582 |
| 40 | G-3.6-1 | 3470 |
| 41 | CZYP | 1897 |
| 42 | ACGR4700 | 3144 |
| 43 | CNL1-4700P | 2315 |
| 44 | CM800AN | 2762 |

**Supplementary Table 3.** Comparison of the hydrogen uptake capacity for M-PC and for M-PC and the state-of-the-art porous materials reported in the literatures.

| References | Sample | SBET (m2 g-1) | H2 uptake (wt %) | | |
| --- | --- | --- | --- | --- | --- |
| 20 bar | 30 bar | 40 bar |
| This work | **M-PC** | **4482** | **5.8** | **6.6** | **8.4** |
| 45 | MOF-210 | 5850 | 6.9 | 7.8 | 8.2 |
| 46 | MOF-5 | 3800 | - | - | 7.1 |
| 47 | NU-100 (MOF) | 6143 | 6.9 | - | - |
| 48 | MOF-5 | 2800 | 5.1 | 5.2 | 5.2 |
| 49 | MOF-177 | 5700 | 6.1 | 6.7 | 7.1 |
| 33 | CN4800 | 3802 | 5.5 | 5.8 | 6.0 |
| 32 | MPPY4 | 3844 | 6.0 | 6.3 | 6.5 |
| 50 | AC-6 | 3808 | 5.1 | 5.4 | 5.6 |
| 37 | LAC4800 | 3235 | 4.8 | - | - |
| 51 | CA-4700 | 3771 | 7.0 | 7.2 | - |
| 52 | Ch700/700/3 | 3066 | - | - | 5.6 |
| 53 | AC-BF900@5Ton | 3323 | 6.5 | - | - |
| 54 | CAC850-5 | 3708 | - | - | 5.8 |
| 55 | UMCM-150 | 2300 | - | - | 5.7 |
| 56 | AG-4–700 | 2264 | 4.5 | 4.6 | 4.7 |
| 57 | ILCOF-1 | 2723 | - | - | 4.7 |
| 58 | DUT-38-A-950-4 | 3100 | 4.1 | 4.42 | 5.2 |
| 59 | Activated carbon | 930 | - | 2.3 | - |
| 60 | PCN-11 | 1931 | 5.1 | 5.2 | 5.2 |
| 61 | CAC1 | 3711 | - | - | 5.8 |
| 62 | CAC4 | 3708 | - | - | 5.8 |
| 63 | Mo2C, 660 | 1875 | 4.35 | 4.35 | 4.35 |
| 64 | KUA6 | 3808 | 5.1 | 5.4 | 5.6 |

**Supplementary Table 4.** Comparison of the CO2 capture capacity for M-PC and for M-PC and the state-of-the-art carbon materials reported in the literatures.

| References | Sample | SBET (m2 g-1) | Carbon dioxide capture (mmol g-1) | | |
| --- | --- | --- | --- | --- | --- |
| 20 bar | 30 bar | 40 bar |
| This work | **M-PC** | **4482** | **24.4** | **30.2** | **39.6** |
| 65 | MOF-117 | 4833 | 25.4 | 29.3 | 30.2 |
| 66 | NAC | 2524 | 16.3 | 20 | - |
| 67 | uGil-800 | 3800 | 20.3 | 24.8 | 27.3 |
| 68 | K-PAF-1-750 | 2926 | 21.6 | 25.6 | 29.5 |
| 69 | A-NPC | 2860 | 19 | 23.8 | - |
| 70 | HPC-5b2-1000 | 2734 | 20.5 | 27 | - |
| 71 | VR-5 | 2895 | 27 | 30.7 | 33.6 |
| 72 | SPC-5 | 2980 | 16.5 | 21.29 | - |
| 73 | B-PC | 3167 | 19.3 | 26 | - |
| 33 | CN4800 | 3802 | 19.5 | - | - |
| 74 | AA-3M | 3220 | 20.4 | - | 30.1 |
| 74 | AC-2M | 3540 | 20.8 | - | 29.8 |
| 74 | AS-2M | 3420 | 20.5 | - | 30.6 |
| 75 | VR93–4:1 | 3410 | 22 | - | 31.8 |
| 76 | A-rNPC | 2580 | 21.1 | 26 | - |
| 77 | HPC5b2-1100 | 2734 | 20.8 | 27 | - |
| 78 | Maxsorb | 3250 | 19 | - | 25.5 |
| 79 | IRMOF-1 | 2833 | 19.4 | - | 22 |
| 34 | L2600P | 2224 | 12.8 | - | - |
| 80 | PA-400-KOH-4-600 | 3322 | 21 | 27.5 | 34.5 |
| 81 | CZ13XFAETP | 3021 | 22 | - | - |
| 82 | ACCA4800 | 3537 | 21.1 | - | - |
| 83 | KLB2 | 1122 | 12.7 | 15.4 | - |
| 84 | G-3.6-2 | 3460 | - | 32.6 | - |

**Supplementary Table 5.** Comparison of the supercapacitive performance for M-PC and representative porous carbon reported in the literatures.

| References | Sample | Capacitance  (F g−1) | Current density  (A g-1) | Electrolyte |
| --- | --- | --- | --- | --- |
| This Work | **M-PC** | **634** | **0.1** | **6 M KOH** |
|  |  | **430** | **0.2** |  |
|  |  | **343** | **0.5** |  |
| 85 | RT-ZnCl2 | 156.1 | 0.1 | 3 M H2SO4 |
| 86 | AMC-4 | 225 | 0.5 | 1 M H2SO4 |
| 87 | HPCSLS-X-1 | 247 | 0.05 | 7 M KOH |
| 88 | CL9.3 | 133.4 | 0.2 | 6 M KOH |
| 89 | NMCSs-11.6 | 213 | 0.5 | 6 M KOH |
| 90 | Porous carbon foams | 280 | 0.1 | 1 M H2SO4 |
| 91 | PCF | 246.5 | 0.5 | 3 M KOH |
| 92 | CESM | 297 | 0.2 | 1 M KOH |
| 93 | A-CCNs-1:2 | 314 | 0.1 | 6 M KOH |
| 94 | BHNC | 301 | 0.1 | 6 M KOH |
| 95 | NC-700-3 | 311 | 0.25 | 30 wt.% KOH |
| 96 | ACSB | 202 | 0.5 | 6 M KOH |
| 97 | CAC2 | 239 | 0.05 | 2 M KOH |
| 98 | AK | 325 | 0.125 | 1 M H2SO4 |
| 99 | AC-700 | 357 | 0.05 | 6 M KOH |
| 100 | HLPC | 342 | 0.2 | 6 M KOH |
| 101 | N,S-ACS2:1 | 404 | 0.1 | 6 M KOH |
| 102 | BSPC-800 | 255 | 0.5 | 6 M KOH |
| 103 | BNC-15 | 268 | 0.1 | 6 M KOH |
| 104 | CA-C-1 | 363 | 0.1 | 1 M H2SO4 |
| 105 | GN/MWCNT | 265 | 0.1 | 6 M KOH |
| 106 | H3PO4/C-500 | 206 | 0.1 | 6 M KOH |
| 107 | Carbon-ZS | 285.8 | 0.1 | 6 M KOH |
| 108 | N-OMCS | 288 | 0.1 | 6 M KOH |
| 109 | AC-600 | 340 | 0.1 | 6 M KOH |
| 110 | PM-600-1.0 | 278 | 0.1 | 1 M H2SO4 |
| 111 | HC/N/KOH | 492 | 0.1 | 1 M H2SO4 |
| 112 | N-MCN850 | 397 | 0.1 | 6 M KOH |
| 113 | NS-PCMSs-SU-750 | 271 | 0.1 | 6 M KOH |
| 114 | NHGCS | 306 | 0.1 | 2 M H2SO4 |
| 115 | GSS | 172 | 0.1 | 6 M KOH |

# References

1. Liu S*, et al.* Large-scale synthesis of porous carbon via one-step CuCl2 activation of rape pollen for high-performance supercapacitors. *J. Mater. Chem. A* **6**, 12046-12055 (2018).

2. Qu W-H, Xu Y-Y, Lu A-H, Zhang X-Q, Li W-C. Converting biowaste corncob residue into high value added porous carbon for supercapacitor electrodes. *Bioresour. Technol.* **189**, 285-291 (2015).

3. Xie L*, et al.* Hierarchical porous carbon microtubes derived from willow catkins for supercapacitor applications. *J. Mater. Chem. A* **4**, 1637-1646 (2016).

4. Romero-Anaya AJ, Ouzzine M, Lillo-Rodenas MA, Linares-Solano A. Spherical carbons: synthesis, characterization and activation processes. *Carbon* **68**, 296-307 (2014).

5. Gong Y, Wang H, Wei Z, Xie L, Wang Y. An efficient way to introduce hierarchical structure into biomass-based hydrothermal carbonaceous materials. *ACS Sustain. Chem. Eng.* **2**, 2435-2441.

6. Tay T, Ucar S, Karagöz S. Preparation and characterization of activated carbon from waste biomass. *J. Hazard. Mater.* **165**, 481-485 (2009).

7. Li Y, Li D, Rao Y, Zhao X, Wu M. Superior CO2, CH4, and H2 uptakes over ultrahigh-surface-area carbon spheres prepared from sustainable biomass-derived char by CO2 activation. *Carbon* **105**, 454-462 (2016).

8. Liang Y*, et al.* Ultrahigh surface area hierarchical porous carbons based on natural well-defined macropores in sisal fibers. *J. Mater. Chem.* **21**, 14424-14427 (2011).

9. Wang J, Senkovska I, Kaskel S, Liu Q. Chemically activated fungi-based porous carbons for hydrogen storage. *Carbon* **75**, 372-380 (2014).

10. Wu H, Mou J, Lin Z, Zheng Q, Lin D. Cloud cap-like, hierarchically porous carbon derived from mushroom as an excellent host cathode for high performance lithium-sulfur batteries. *Electrochim. Acta* **212**, 1021-1030 (2016).

11. Wu H*, et al.* Activator-induced tuning of micromorphology and electrochemical properties in biomass carbonaceous materials derived from mushroom for lithium-sulfur batteries. *Electrochim. Acta* **242**, 146-158 (2017).

12. Wang J, Qian L. Fungi-derived hierarchically porous carbons for high-performance supercapacitors. *Rsc Adv.* **5**, 4396-4403 (2014).

13. Foo K, Hameed B. Adsorption characteristics of industrial solid waste derived activated carbon prepared by microwave heating for methylene blue. *Fuel Process. Technol.* **99**, 103-109 (2012).

14. Zhu L, Shen F, Smith Jr RL, Yan L, Li L, Qi X. Black liquor-derived porous carbons from rice straw for high-performance supercapacitors. *Chem. Eng. J.* **316**, 770-777 (2017).

15. Jin X-J, Yu Z-M, Wu Y. Preparation of activated carbon from lignin obtained by straw pulping by KOH and K2CO3 chemical activation. *Cell. Chem. Technol.* **46**, 79 (2012).

16. Long C, Chen X, Jiang L, Zhi L, Fan Z. Porous layer-stacking carbon derived from in-built template in biomass for high volumetric performance supercapacitors. *Nano Energy* **12**, 141-151 (2015).

17. Liu X, Antonietti M. Molten salt activation for synthesis of porous carbon nanostructures and carbon sheets. *Carbon* **69**, 460-466 (2014).

18. Xu B, Hou S, Chu M, Cao G, Yang Y. An activation-free method for preparing microporous carbon by the pyrolysis of poly (vinylidene fluoride). *Carbon* **48**, 2812-2814 (2010).

19. Wang J, Liu Q. An efficient one-step condensation and activation strategy to synthesize porous carbons with optimal micropore sizes for highly selective CO2 adsorption. *Nanoscale* **6**, 4148-4156 (2014).

20. Qiao Z-j, Chen M-m, Wang C-y, Yuan Y-c. Humic acids-based hierarchical porous carbons as high-rate performance electrodes for symmetric supercapacitors. *Bioresour. Technol.* **163**, 386-389 (2014).

21. Cruz G, Pirilä M, Huuhtanen M, Carrión L, Alvarenga E, Keiski R. Production of activated carbon from cocoa (Theobroma cacao) pod husk. *J. Environ. Eng.* **2**, 2 (2012).

22. Shi Y*, et al.* Porous carbon with willow-leaf-shaped pores for high-performance supercapacitors. *ACS Appl. Mater. Inter.* **9**, 42699-42707 (2017).

23. Cai Y*, et al.* Facile synthesis of three-dimensional heteroatom-doped and hierarchical egg-box-like carbons derived from moringa oleifera branches for high-performance supercapacitors. *ACS Appl. Mater. Inter.* **8**, 33060-33071 (2016).

24. Huang J*, et al.* Ultrahigh-surface-area hierarchical porous carbon from chitosan: acetic acid mediated efficient synthesis and its application in superior supercapacitors. *J. Mater. Chem. A* **5**, 24775-24781 (2017).

25. Huang J*, et al.* Revealing contribution of pore size to high hydrogen storage capacity. *Int. J. Hydrogen Energy* **43**, 18077-18082 (2018).

26. Li Y*, et al.* KNO3-mediated synthesis of high-surface-area polyacrylonitrile-based carbon material for exceptional supercapacitor. *Carbon* **152**, 120-127 (2019).

27. Li W, Liu S, Ning P, Zeng F, Liang Y. Post-treatment-free synthesis of highly mesoporous carbon for high-performance supercapacitor in aqueous electrolytes. *J. Power Sources* **357**, 138-143 (2017).

28. Yu P*, et al.* Rational synthesis of highly porous carbon from waste bagasse for advanced supercapacitor application. *ACS Sustain. Chem. Eng.* **6**, 15325-15332 (2018).

29. Wang H, Gao Q, Hu J. High hydrogen storage capacity of porous carbons prepared by using activated carbon. *J. Am. Chem. Soc.* **131**, 7016-7022 (2009).

30. Zheng Z, Gao Q, Jiang J. High hydrogen uptake capacity of mesoporous nitrogen-doped carbons activated using potassium hydroxide. *Carbon* **48**, 2968-2973 (2010).

31. Wang H, Gao Q, Hu J, Chen Z. High performance of nanoporous carbon in cryogenic hydrogen storage and electrochemical capacitance. *Carbon* **47**, 2259-2268 (2009).

32. Adeniran B, Mokaya R. Compactivation: a mechanochemical approach to carbons with superior porosity and exceptional performance for hydrogen and CO2 storage. *Nano Energy* **16**, 173-185 (2015).

33. Adeniran B, Mokaya R. Low temperature synthesized carbon nanotube superstructures with superior CO2 and hydrogen storage capacity. *J. Mater. Chem. A* **3**, 5148-5161 (2015).

34. Balahmar N, Mitchell AC, Mokaya R. Generalized mechanochemical synthesis of biomass‐derived sustainable carbons for high performance CO2 storage. *Adv. Energy Mater.* **5**, 1500867 (2015).

35. Adeniran B, Mokaya R. Is N-doping in porous carbons beneficial for CO2 storage? Experimental demonstration of the relative effects of pore size and N-doping. *Chem. Mater.* **28**, 994-1001 (2016).

36. Balahmar N, Al-Jumialy AS, Mokaya R. Biomass to porous carbon in one step: directly activated biomass for high performance CO2 storage. *J. Mater. Chem. A* **5**, 12330-12339 (2017).

37. Sangchoom W, Mokaya R. Valorization of lignin waste: carbons from hydrothermal carbonization of renewable lignin as superior sorbents for CO2 and hydrogen storage. *ACS Sustain. Chem. Eng.* **3**, 1658-1667 (2015).

38. Adeniran B, Masika E, Mokaya R. A family of microporous carbons prepared via a simple metal salt carbonization route with high selectivity for exceptional gravimetric and volumetric post-combustion CO2 capture. *J. Mater. Chem. A* **2**, 270 (2014).

39. Almasoudi A, Mokaya R. Porosity modulation of activated ZIF-templated carbons via compaction for hydrogen and CO2 storage applications. *J. Mater. Chem. A* **2**, 10960-10968 (2014).

40. Sevilla M, Al-Jumialy ASM, Fuertes AB, Mokaya R. Optimization of the pore structure of biomass-based carbons in relation to their use for CO2 capture under low-and high-pressure regimes. *ACS Appl. Mater. Inter.* **10**, 1623-1633 (2018).

41. Balahmar N, Lowbridge AM, Mokaya R. Templating of carbon in zeolites under pressure: synthesis of pelletized zeolite templated carbons with improved porosity and packing density for superior gas (CO2 and H2) uptake properties. *J. Mater. Chem. A* **4**, 14254-14266 (2016).

42. Coromina HM, Walsh DA, Mokaya R. Biomass-derived activated carbon with simultaneously enhanced CO2 uptake for both pre and post combustion capture applications. *J. Mater. Chem. A* **4**, 280-289 (2016).

43. Haffner-Staton E, Balahmar N, Mokaya R. High yield and high packing density porous carbon for unprecedented CO2 capture from the first attempt at activation of air-carbonized biomass. *J. Mater. Chem. A* **4**, 13324-13335 (2016).

44. Xia Y, Walker GS, Grant DM, Mokaya R. Hydrogen storage in high surface area carbons: experimental demonstration of the effects of nitrogen doping. *J. Am. Chem. Soc.* **131**, 16493-16499 (2009).

45. Furukawa H*, et al.* Ultrahigh porosity in metal-organic frameworks. *Science* **329**, 424-428 (2010).

46. Kaye SS, Dailly A, Yaghi OM, Long JR. Impact of preparation and handling on the hydrogen storage properties of Zn4O (1, 4-benzenedicarboxylate)3 (MOF-5). *J Am. Chem. Soc.* **129**, 14176-14177 (2007).

47. Farha OK*, et al.* De novo synthesis of a metal–organic framework material featuring ultrahigh surface area and gas storage capacities. *Nat. Chem.* **2**, 944-948 (2010).

48. Juan-Juan J, Marco-Lozar J, Suárez-García F, Cazorla-Amorós D, Linares-Solano A. A comparison of hydrogen storage in activated carbons and a metal–organic framework (MOF-5). *Carbon* **48**, 2906-2909 (2010).

49. Wongfoy AG, Matzger AJ, Yaghi OM. Exceptional H2 saturation uptake in microporous metal-organic frameworks. *J. Am. Chem. Soc.* **128**, 3494-3495 (2006).

50. Jorda-Beneyto M, Lozano-Castello D, Suarez-Garcia F, Cazorla-Amoros D, Linares-Solano A. Advanced activated carbon monoliths and activated carbons for hydrogen storage. *Micropor. Mesopor. Mater.* **112**, 235-242 (2008).

51. Blankenship II TS, Balahmar N, Mokaya R. Oxygen-rich microporous carbons with exceptional hydrogen storage capacity. *Nat. Commun.* **8**, 1-12 (2017).

52. Wrobel-Iwaniec I, Diez N, Gryglewicz G. Chitosan-based highly activated carbons for hydrogen storage. *Int. J. Hydrogen Energy* **40**, 5788-5796 (2015).

53. Almasoudi A, Mokaya R. Porosity modulation of activated ZIF-templated carbons via compaction for hydrogen and CO2 storage applications. *J. Mater. Chem. A* **2**, 10960-10968 (2014).

54. Wang DB, Geng Z, Zhang CM, Zhou XY, Liu XP. Effects of thermal activation conditions on the microstructure regulation of corncob-derived activated carbon for hydrogen storage. *J. Energy Chem.* **23**, 601-608 (2014).

55. Wong-Foy AG, Lebel O, Matzger AJ. Porous crystal derived from a tricarboxylate linker with two distinct binding motifs. *J. Am. Chem. Soc.* **129**, 15740-15741 (2007).

56. Wang JC, Senkovska I, Kaskel S, Liu Q. Chemically activated fungi-based porous carbons for hydrogen storage. *Carbon* **75**, 372-380 (2014).

57. Mohammad Gulam R, Ali Kemal S, Zafer K, Reich TE, Ransheng D, El-Kaderi HM. A 2D mesoporous imine-linked covalent organic framework for high pressure gas storage applications. *Chem.-Eur. J.* **19**, 3324-3328 (2013).

58. Oschatz M, Borchardt L, Senkovska I, Klein N, Leistner M, Kaskel S. Carbon dioxide activated carbide-derived carbon monoliths as high performance adsorbents. *Carbon* **56**, 139-145 (2013).

59. Aboud MFA, ALOthman ZA, Habila MA, Zlotea C, Latroche M, Cuevas F. Hydrogen storage in pristine and D10-block metal-anchored activated carbon made from local wastes. *Energies* **8**, 3578-3590 (2015).

60. Wang XS*, et al.* Metal-organic frameworks based on double-bond-coupled di-isophthalate linkers with high hydrogen and methane uptakes. *Chem. Mater.* **20**, 3145-3152 (2008).

61. Geng Z, Zhang CM, Wang DB, Zhou XY, Cai M. Pore size effects of nanoporous carbons with ultra-high surface area on high-pressure hydrogen storage. *J. Energy Chem.* **24**, 1-8 (2015).

62. Liu XP, Zhang CM, Geng Z, Cai M. High-pressure hydrogen storage and optimizing fabrication of corncob-derived activated carbon. *Micropor. Mesopor. Mater.* **194**, 60-65 (2014).

63. Gogotsi Y*, et al.* Importance of pore size in high-pressure hydrogen storage by porous carbons. *Int. J. Hydrogen Energy* **34**, 6314-6319 (2009).

64. Jordá-Beneyto M, Suárez-García F, Lozano-Castelló D, Cazorla-Amorós D, Linares-Solano A. Hydrogen storage on chemically activated carbons and carbon nanomaterials at high pressures. *Carbon* **45**, 293-303 (2007).

65. Youn H-K, Kim J, Chandrasekar G, Jin H, Ahn W-S. High pressure carbon dioxide adsorption on nanoporous carbons prepared by Zeolite Y templating. *Mater. Lett.* **65**, 1772-1774 (2011).

66. Zhang Z, Xu M, Wang H, Li Z. Enhancement of CO2 adsorption on high surface area activated carbon modified by N2, H2 and ammonia. *Chem. Eng. J.* **160**, 571-577 (2010).

67. Jalilov AS, Li Y, Tian J, Tour JM. Ultra‐high surface area activated porous asphalt for CO2 capture through competitive adsorption at high pressures. *Adv. Energy Mater.* **7**, 1600693 (2017).

68. Li Y, Ben T, Zhang B, Fu Y, Qiu S. Ultrahigh gas storage both at low and high pressures in KOH-activated carbonized porous aromatic frameworks. *Sci. Rep.* **3**, 2420 (2013).

69. Jalilov AS*, et al.* Asphalt-derived high surface area activated porous carbons for carbon dioxide capture. *ACS Appl. Mater. Inter.* **7**, 1376-1382 (2015).

70. Srinivas G, Krungleviciute V, Guo Z-X, Yildirim T. Exceptional CO2 capture in a hierarchically porous carbon with simultaneous high surface area and pore volume. *Energy Environ. Sci.* **7**, 335-342 (2014).

71. Silvestre-Albero J, Wahby A, Sepúlveda-Escribano A, Martínez-Escandell M, Kaneko K, Rodríguez-Reinoso F. Ultrahigh CO2 adsorption capacity on carbon molecular sieves at room temperature. *Chem. Commun.* **47**, 6840-6842 (2011).

72. Ghosh S, Barron AR. The effect of KOH concentration on chemical activation of porous carbon sorbents for carbon dioxide uptake and carbon dioxide–methane selectivity: the relative formation of micro-(< 2 nm) versus meso-(> 2 nm) porosity. *Sustain. Energy Fuels* **1**, 806-813 (2017).

73. Li Y, Ruan G, Jalilov AS, Tarkunde YR, Fei H, Tour JM. Biochar as a renewable source for high-performance CO2 sorbent. *Carbon* **107**, 344-351 (2016).

74. Sevilla M, Sangchoom W, Balahmar N, Fuertes AB, Mokaya R. Highly porous renewable carbons for enhanced storage of energy-related gases (H2 and CO2) at high pressures. *ACS Sustain. Chem. Eng.* **4**, 4710-4716 (2016).

75. Casco ME, Martinez-Escandell M, Silvestre-Albero J, Rodriguez-Reinoso F. Effect of the porous structure in carbon materials for CO2 capture at atmospheric and high-pressure. *Carbon* **67**, 230-235 (2014).

76. Jalilov AS*, et al.* Asphalt-derived high surface area activated porous carbons for carbon dioxide capture. *ACS Appl. Mater. Inter.* **7**, 1376-1382 (2015).

77. Srinivas G, Krungleviciute V, Guo ZX, Yildirim T. Exceptional CO2 capture in a hierarchically porous carbon with simultaneous high surface area and pore volume. *Energy Environ. Sci.* **7**, 335-342 (2014).

78. Himeno S, Komatsu T, Fujita S. High-pressure adsorption equilibria of methane and carbon dioxide on several activated carbons. *J. Chem. Eng. Data* **50**, 369-376 (2005).

79. Millward AR, Yaghi OM. Metal-organic frameworks with exceptionally high capacity for storage of carbon dioxide at room temperature. *J. Am. Chem. Soc.* **127**, 17998 (2005).

80. Song J, Shen W, Wang J, Fan W. Superior carbon-based CO2 adsorbents prepared from poplar anthers. *Carbon* **69**, 255-263 (2014).

81. Balahmar N, Lowbridge AM, Mokaya R. Templating of carbon in zeolites under pressure: synthesis of pelletized zeolite templated carbons with improved porosity and packing density for superior gas (CO2 and H2) uptake properties. *J. Mater. Chem. A* **4**, 14254-14266 (2016).

82. Coromina HM, Walsh DA, Mokaya R. Biomass-derived activated carbon with simultaneously enhanced CO2 uptake for both pre and post combustion capture applications. *J. Mater. Chem. A* **4**, 280-289 (2016).

83. Singh G, Kim IY, Lakhi KS, Srivastava P, Naidu R, Vinu A. Single step synthesis of activated bio-carbons with a high surface area and their excellent CO2 adsorption capacity. *Carbon* **116**, 448-455 (2017).

84. Sevilla M, Al-Jumialy ASM, Fuertes AB, Mokaya R. Optimization of the pore structure of biomass-based carbons in relation to their use for CO2 capture under low- and high-pressure regimes. *ACS Appl. Mater. Inter.* **10**, 1623-1633 (2018).

85. Bing X, Jiang X, Tian M, Wang J, Qiao W, Ling L. Metal chloride-assisted synthesis of hierarchical porous carbons for high-rate-performance supercapacitor. *RSC Adv.* **7**, 26650-26657 (2017).

86. Wang Z, Zhou M, Chen H, Jiang J, Guan S. Hierarchical activated mesoporous phenolic-resin-based carbons for supercapacitors. *Chem. Asian J* **9**, 2789-2797 (2015).

87. Pang J, Zhang W, Zhang J, Cao G, Han M, Yang Y. Facile and sustainable synthesis of sodium lignosulfonate derived hierarchical porous carbons for supercapacitors with high volumetric energy densities. *Green Chem.* **19**, 3916-3926 (2017).

88. Sulaiman K, Mat A, Arof A. Activated carbon from coconut leaves for electrical double-layer capacitor. *Ionics* **22**, 911-918 (2016).

89. Jin ZY, Lu AH, Xu YY, Zhang JT, Li WC. Ionic liquid-assisted synthesis of microporous carbon nanosheets for use in high rate and long cycle life supercapacitors. *Adv. Mater.* **26**, 3700-3705 (2014).

90. Wang C, O’Connell MJ, Chan CK. Facile one-pot synthesis of highly porous carbon foams for high-performance supercapacitors using template-free direct pyrolysis. *ACS Appl. Mater. Inter.* **7**, 8952-8960 (2015).

91. Zhang F*, et al.* Hierarchically porous carbon foams for electric double layer capacitors. *Nano Res.* **9**, 2875-2888 (2016).

92. Li Z*, et al.* Carbonized chicken eggshell membranes with 3D architectures as high-performance electrode materials for supercapacitors. *Adv. Energy Mater.* **2**, 431-437 (2012).

93. Song K, Song W-L, Fan L-Z. Scalable fabrication of exceptional 3D carbon networks for supercapacitors. *J. Mater. Chem. A* **3**, 16104-16111 (2015).

94. Tian W*, et al.* Bio-inspired beehive-like hierarchical nanoporous carbon derived from bamboo-based industrial by-product as a high performance supercapacitor electrode material. *J. Mater. Chem. A* **3**, 5656-5664 (2015).

95. Li X*, et al.* Preparation of capacitor’s electrode from sunflower seed shell. *Bioresour. Technol.* **102**, 1118-1123 (2011).

96. Xu GY*, et al.* Biomass-derived porous carbon materials with sulfur and nitrogen dual-doping for energy storage. *Green Chem.* **17**, 1668-1674 (2015).

97. Wu MB, Li RC, He XJ, Zhang HB, Sui WB, Tan MH. Microwave-assisted preparation of peanut shell-based activated carbons and their use in electrochemical capacitors. *New Carbon Mater.* **30**, 86-91 (2015).

98. Elmouwahidi A, Zapata-Benabithe Z, Carrasco-Marín F, Moreno-Castilla C. Activated carbons from KOH-activation of argan (Argania spinosa) seed shells as supercapacitor electrodes. *Bioresour. Technol.* **111**, 185-190 (2012).

99. Gao F, Qu J, Zhao Z, Wang Z, Qiu J. Nitrogen-doped activated carbon derived from prawn shells for high-performance supercapacitors. *Electrochim. Acta* **190**, 1134-1141 (2016).

100. Liang Q*, et al.* A honeycomb-like porous carbon derived from pomelo peel for use in high-performance supercapacitors. *Nanoscale* **6**, 13831-13837 (2014).

101. Liu Y, Xiao Z, Liu Y, Fan L-Z. Biowaste-derived 3D honeycomb-like porous carbon with binary-heteroatom doping for high-performance flexible solid-state supercapacitors. *J. Mater. Chem. A* **6**, 160-166 (2018).

102. Li J, Zan G, Wu Q. Nitrogen and sulfur self-doped porous carbon from brussel sprouts as electrode materials for high stable supercapacitors. *RSC Adv.* **6**, 57464-57472 (2016).

103. Guo H, Gao Q. Boron and nitrogen co-doped porous carbon and its enhanced properties as supercapacitor. *J. Power Sources* **186**, 551-556 (2009).

104. Zhou M, Pu F, Wang Z, Guan S. Nitrogen-doped porous carbons through KOH activation with superior performance in supercapacitors. *Carbon* **68**, 185-194 (2014).

105. Lu X*, et al.* A flexible graphene/multiwalled carbon nanotube film as a high performance electrode material for supercapacitors. *Electrochim. Acta* **56**, 5115-5121 (2011).

106. Qu J, Geng C, Lv S, Shao G, Ma S, Wu M. Nitrogen, oxygen and phosphorus decorated porous carbons derived from shrimp shells for supercapacitors. *Electrochim. Acta* **176**, 982-988 (2015).

107. Zhong S, Zhan C, Cao D. Zeolitic imidazolate framework-derived nitrogen-doped porous carbons as high performance supercapacitor electrode materials. *Carbon* **85**, 51-59 (2015).

108. Wang J-G*, et al.* One-pot synthesis of nitrogen-doped ordered mesoporous carbon spheres for high-rate and long-cycle life supercapacitors. *Carbon* **127**, 85-92 (2018).

109. Wang K*, et al.* Promising biomass-based activated carbons derived from willow catkins for high performance supercapacitors. *Electrochim. Acta* **166**, 1-11 (2015).

110. Jiang J*, et al.* Nitrogen-doped hierarchical porous carbon microsphere through KOH activation for supercapacitors. *J. Colloid Inter. Sci.* **452**, 54-61 (2015).

111. Gao F, Shao G, Qu J, Lv S, Li Y, Wu M. Tailoring of porous and nitrogen-rich carbons derived from hydrochar for high-performance supercapacitor electrodes. *Electrochim. Acta* **155**, 201-208 (2015).

112. Zhao Y*, et al.* Nitrogen-functionalized microporous carbon nanoparticles for high performance supercapacitor electrode. *Electrochim. Acta* **153**, 448-455 (2015).

113. Zhang J, Zhou J, Wang D, Hou L, Gao F. Nitrogen and sulfur codoped porous carbon microsphere: a high performance electrode in supercapacitor. *Electrochim. Acta* **191**, 933-939 (2016).

114. Ma F*, et al.* A facile route for nitrogen-doped hollow graphitic carbon spheres with superior performance in supercapacitors. *J. Mater. Chem.* **22**, 13464-13468 (2012).

115. Zeng F*, et al.* Supercapacitors based on high-quality graphene scrolls. *Nanoscale* **4**, 3997-4001 (2012).
